# Supplementary material for: Short-chain soluble polyphosphate fertilizers increased soil P availability and mobility by reducing P fixation in two contrasting calcareous soils
Source: PeerJ. 2021 Jul 5;9:e11493. doi: 10.7717/peerj.11493 (PMC8265382; doi:10.7717/peerj.11493)
Supplement: Supplemental Information 2 [file peerj-09-11493-s002.xlsx]

## Sheet: Olsen-P Varation in Loam soil
Olsen-P P variations in loam soil
Basal application
Movement Distance (mm)	CK1-1	CK-2	CK-3	MAP-1	MAP-2	MAP-3	PA-1	PA-2	PA-3	APP-1	APP-2	APP-3
0-5	18.7478	17.4	16.0478	136.291	134.747	177.919	424.605	440.421	408.788	3218.68	3529.94	3440.72
5_10	17.7292	12.6646	16.9688	119.236	120.831	120.03	83.637	78.0104	47.7953	323.905	348.448	373.935
10_15	21.6846	21.9331	16.3196	113.21	104.511	112.144	52.0541	46.2583	46.2963	97.4476	98.9234	95.9717
15-20	19.2388	13.1264	17.2642	77.0032	74.1933	85	50.2258	36.6607	29.6496	80.6252	75.2889	76.3691
20-25	19.7038	12.6495	14.5942	52.9255	67.7078	60.651	33.564	23.2997	28.7657	67.1868	63.7121	60.5034
25-30	17.7625	15.4592	14.0573	46.4466	41.9539	48.491	22.2388	17.3282	19.906	44.4793	62.8016	45.0374
30-35	15.69	16.3909	14.9982	40.2487	47.0321	35.3997	24.1353	16.8886	19.9211	45.4081	46.988	43.8281
35-40	14.53	12.2085	16.845	37.9073	32.817	38.3322	23.1491	11.8494	20.7965	38.8955	45.1506	32.6403
40-45	15.68	15.4394	15.9133	34.3877	38.268	37.0009	14.1808	13.6527	21.6754	35.1152	42.402	27.8283
45-50	22.1783	21.46	16.8551	31.4138	34.1819	26.0843	18.4741	17.3531	23.4542	27.315	30.7914	23.8385
50-55	20.8743	16.6098	16.5976	29.0777	33.6276	22.7109	21.0119	15.6604	21.8738	23.2219	25.503	20.9408
55-60	19.6812	17.2852	15.5142	26.4331	24.5087	20.1673	18.862	12.905	17.2601	20.2469	22.5813	17.9125
60-65	19.0512	18.3992	16.2018	16.0212	32.7103	20.3106	17.1595	11.7982	17.1123	19.8137	22.2879	17.3395
65-70	20.1059	16.0555	14.8696	20.6575	26.3464	35.1578	16.9096	12.0771	17.9175	19.61	20.5024	18.7176
70-75	18.7896	17.982	15.0054	19.0161	23.9997	20.7805	19.0258	10.0206	20.0427	20.7857	22.8933	18.678
75-80	18.4752	18.8427	15.9375	17.4624	22.5772	20.1875	18.8718	19.2606	17.9275	16.7098	17.0132	16.4064
80-85	18.9066	12.2908	14.6024	15.7355	26.8212	18.5767	18.8906	18.4766	18.0625	17.7562	18.2908	17.2215
85-90	21.0038	15.9251	14.6024	17.1609	24.6081	18.0423	18.4675	18.057	17.6464	20.4834	23.9783	16.9884
90-95	21.7599	15.3506	17.5123	16.8489	22.7643	16.9946	18.0594	18.8476	19.6358	21.2161	24.5654	17.8668
95-100	19.8276	18.954	15.6637	13.9334	18.0292	18.9907	17.4836	17.4316	17.3797	20.8012	23.591	18.0113
100-120	21.2911	16.9881	13.5469	16.0161	15.0465	20.1786	18.8688	19.5225	20.1762	23.756	26.1914	21.3206
120-140	19.2166	16.0587	16.1915	15.0398	15.1742	19.763	16.9265	17.6247	18.323	20.7945	23.1628	18.4263
140-160	19.0383	16.721	16.1941	17.1283	15.7035	19.3898	18.1986	19.1846	20.1706	21.9167	23.5552	20.2781
160-180	20.0794	18.3838	16.4543	14.7642	15.7342	18.056	16.7447	17.9982	19.2517	19.4758	21.3376	17.614
180-200	20.391	20.9066	17.9275	15.463	15.9537	18.0344	18.3269	17.1976	16.0684	17.7738	18.9593	16.5883
200-220	20.533	16.6211	13.5398	18.7618	18.7989	18.0625	18.0312	16.917	15.8028	18.7375	18.1355	19.3396
220-240	20.3633	19.2651	16.4418	17.1807	20.6194	16.7277	17.0245	16.2753	15.526	15.0808	17.0268	13.1348
240-260	19.8134	17.5725	18.1764	14.6293	10.8089	18.3245	19.6212	17.7758	15.9305	17.9474	17.5725	18.3223
260-280	15.3	15.0597	15.5384	17.6865	15.5501	19.518	17.3227	16.2923	15.2618	17.8827	16.94	18.8255
280-300	18.3428	14.2447	16.053	12.2618	14.2244	14.3283	17.0605	17.6192	18.1779	16.1685	15.7361	16.6009
Split repeated application
Movement Distance (mm)	CK1-1	CK-2	CK-3	MAP-1	MAP-2	MAP-3	PA-1	PA-2	PA-3	APP-1	APP-2	APP-3
0-5	18.7478	17.4	16.0478	127.418	130.066	120.225	138.015	129.18	120.354	545.741	592.549	523.876
5_10	17.7292	12.6646	16.9688	120.206	114.23	96.4937	120.392	110.554	126.106	544.807	512.407	559.883
10_15	21.6846	21.9331	16.3196	97.9816	92.3741	95.18	108.544	76.1879	97.7838	454.501	424.075	394.36
15-20	19.2388	13.1264	17.2642	79.2743	56.9952	63.95	75.7526	56.2805	66.3505	315.617	332.653	285.104
20-25	19.7038	12.6495	14.5942	70.4227	56.2702	59.3963	59.4642	43.3901	54.4379	281.643	267.738	245.417
25-30	17.7625	15.4592	14.0573	55.3327	60.0229	46.4491	38.63	34.3526	42.8998	226.896	216.705	197.559
30-35	15.69	16.3909	14.9982	50.2542	52.3658	47.8087	54.6693	25.1443	33.5626	174.094	196.254	181.554
35-40	14.53	12.2085	16.845	37.4993	37.0143	45.599	54.1314	34.7966	37.6076	153.948	171.341	158.381
40-45	15.68	15.4394	15.9133	39.6839	39.7203	40.4284	53.1641	34.3499	31.362	137.762	151.53	125.298
45-50	22.1783	21.46	16.8551	32.4331	32.0311	39.5316	44.3636	36.554	31.4185	128.788	115.707	112.304
50-55	20.8743	16.6098	16.5976	38.5397	30.5203	39.0108	43.8229	37.1458	27.7445	107.593	96.9052	107.846
55-60	19.6812	17.2852	15.5142	37.8087	21.7274	38.5002	40.7706	22.0081	22.5511	95.9717	79.9199	79.4365
60-65	19.0512	18.3992	16.2018	39.4995	22.5087	33.0558	23.9578	29.5479	19.6421	68.3395	57.2963	58.2325
65-70	20.1059	16.0555	14.8696	39.2741	23.3191	24.4316	29.7118	14.9837	15.3829	35.9274	28.4829	36.3881
70-75	18.7896	17.982	15.0054	35.1725	22.3423	25.7574	23.6559	17.3304	19.2517	47.2759	33.8727	30.7953
75-80	18.4752	18.8427	15.9375	33.1869	22.5033	25.6144	26.3067	19.2575	16.9925	33.4473	35.1271	21.3717
80-85	18.9066	12.2908	14.6024	27.2312	22.076	22.5637	21.5722	15.1171	18.4477	32.3338	26.7456	19.7582
85-90	21.0038	15.9251	14.6024	27.6972	22.8153	22.6837	19.2181	15.4036	20.0275	32.7191	25.3811	16.5996
90-95	21.7599	15.3506	17.5123	24.7365	23.5029	23.8824	22.2781	16.9273	15.1249	21.0099	19.1129	20.0732
95-100	19.8276	18.954	15.6637	24.7405	23.561	22.1717	19.8094	11.3771	16.7243	21.2298	17.7371	24.5532
100-120	21.2911	16.9881	13.5469	24.0514	23.8449	19.6429	18.4701	13.607	18.0611	23.7639	16.4312	14.7333
120-140	19.2166	16.0587	16.1915	36.0047	22.5213	17.5313	17.8762	10.033	13.0141	21.9865	14.2208	10.2013
140-160	19.0383	16.721	16.1941	17.4476	23.5591	19.9211	19.9517	11.963	17.6605	23.0213	16.4528	16.5843
160-180	20.0794	18.3838	16.4543	24.0197	23.172	22.8392	19.9095	13.6059	13.9314	22.6417	16.8412	15.782
180-200	20.391	20.9066	17.9275	22.4758	21.6918	23.2385	20.4995	13.3337	15.6562	21.4544	16.8714	16.4516
200-220	20.533	16.6211	13.5398	22.1491	20.9142	23.2125	18.4208	13.4806	17.7819	20.8368	17.8757	17.513
220-240	20.3633	19.2651	16.4418	21.2894	19.3721	21.102	20.0666	17.1556	16.4438	17.1	18.8457	15.3614
240-260	19.8134	17.5725	18.1764	23.3854	20.7216	21.2152	19.8945	15.6766	14.9892	19.9389	19.8168	18.5596
260-280	15.3	15.0597	15.5384	23.0286	19.9573	18.3281	19.4323	11.4057	14.5989	20.8168	16.9935	15.3657
280-300	18.3428	14.2447	16.053	14.3236	15.1445	14.6029	16.9451	14.5781	12.6071	20.2562	14.493	17.37

## Sheet: Olsen-P variation in Clay soil
Olsen-P P variations in Clay soil
Basal application
Movement Distance (mm)	CK1-1	CK-2	CK-3	MAP-1	MAP-2	MAP-3	PA-1	PA-2	PA-3	APP-1	APP-2	APP-3
0-5	11.28	11.41	11.14	133.74	145.41	Absent	167.97	193.4	215.49	2229.97	2245.52	2289.43
5_10	11.93	11.43	12.43	138.26	130.99	Absent	92.34	102.05	96.11	172.93	173.96	185.47
10_15	12.35	10.54	14.17	106.72	95.63	Absent	75.17	79.5	72.66	96.48	105.8	111.44
15-20	12.44	10.84	14.04	89.4	73.39	Absent	61.32	61.83	68.26	92.78	99.83	101.22
20-25	12.65	11.85	13.45	67.6	66.01	Absent	46.7	48.03	52.96	84.43	82.6	82.17
25-30	13.01	13.73	12.29	60.32	56.49	Absent	41.08	38.9	44.96	65.59	62.26	65.99
30-35	13.02	12	14.03	49.82	39.94	Absent	38.33	28.39	31.62	51.25	56.79	58.07
35-40	13.1	12.87	13.32	39.59	28.81	Absent	29.34	22.31	25.51	35.91	33.3	38.53
40-45	14.16	14.88	13.44	25.25	20.98	Absent	25.56	17.06	21.74	22.17	21.7	27.38
45-50	12.07	10.98	13.16	20.27	16.36	Absent	21.29	14.81	17.13	19.46	18.94	19.98
50-55	11.86	10.84	12.87	17.5	13.3	Absent	16.71	14.95	17.4	13.01	12.19	15.89
55-60	12.94	13.17	12.7	16.08	13.57	Absent	15.28	14.98	16.57	11.92	17.59	14.07
60-65	11.42	9.83	13	16.49	15.23	Absent	22.96	13.97	15.75	12.34	15.8	15.45
65-70	12.73	11.41	14.04	16.79	14.13	Absent	14.56	15.68	14.9	12.32	14.8	15.05
70-75	13.07	11.99	14.15	14.46	13.42	Absent	15.86	15.39	16.29	12.6	14.41	13.93
75-80	12.95	10.27	15.63	15.34	11.79	Absent	15.85	14.39	15.19	13.45	13.16	15.32
80-85	12.21	12.01	12.42	14.89	11.37	Absent	14.87	15.53	15.05	14.27	12.07	15.04
85-90	13.67	13.45	13.89	15.05	12.75	Absent	15.58	14.55	16.86	14.53	12.31	14.76
90-95	12.87	11.71	14.03	15.2	13.57	Absent	17.42	12.89	13.79	13.87	14.6	15.33
95-100	11.85	11.57	12.13	14.33	14.29	Absent	15.57	14.97	13.79	13.15	14.71	14.77
Split repeated application
Movement Distance (mm)	CK1-1	CK-2	CK-3	MAP-1	MAP-2	MAP-3	PA-1	PA-2	PA-3	APP-1	APP-2	APP-3
0-5	11.28	11.41	11.14	126.88	124.12	106.75	145.29	135.22	155.37	505.29	420.72	496.78
5_10	11.93	11.43	12.43	116.75	111.71	94.4	104.06	103.54	104.59	367.9	334.42	371.24
10_15	12.35	10.54	14.17	101.99	98.34	75.66	93.11	87.29	98.93	278.2	293.91	309.61
15-20	12.44	10.84	14.04	84.22	76.55	83.68	81.68	80.71	82.64	237.5	203.49	227.97
20-25	12.65	11.85	13.45	67.52	72.99	70.26	73.24	73.06	73.43	204.06	187	220.3
25-30	13.01	13.73	12.29	62.1	59.63	60.87	48.9	65.57	48.87	190.95	181.27	203.73
30-35	13.02	12	14.03	52.3	45.67	45.89	48.46	54.12	36.05	174.55	160.74	181.58
35-40	13.1	12.87	13.32	46.02	31.04	37.51	48.57	41.39	22.97	147.41	123.38	135.39
40-45	14.16	14.88	13.44	39.26	24.42	31.38	30.74	32.81	26.03	146.96	136.61	157.43
45-50	12.07	10.98	13.16	33.68	22.28	20.76	26.48	22.98	26.03	114	133.85	113.44
50-55	11.86	10.84	12.87	20.23	18.55	16.59	23.63	17.98	24.37	105.69	114.85	118.87
55-60	12.94	13.17	12.7	20	16.13	12.26	22.8	15.36	24.48	74.25	88.75	85.22
60-65	11.42	9.83	13	17.57	12.03	13.64	24.99	14.81	15.59	53.42	64.71	66.36
65-70	12.73	11.41	14.04	18.27	13.72	13.95	19	13.43	17.58	53.45	58.79	48.12
70-75	13.07	11.99	14.15	20.98	12.9	11.42	16.42	15.51	14.22	27.83	42.93	28.71
75-80	12.95	10.27	15.63	17.27	12.61	11.84	14.13	14.28	14.36	12.89	28.02	18.67
80-85	12.21	12.01	12.42	17.98	12.48	13.66	12.15	13.57	14.35	13.15	16.31	14.37
85-90	13.67	13.45	13.89	18.7	13.71	14.68	11.57	16.08	14.21	14.29	15.19	13.81
90-95	12.87	11.71	14.03	18.84	11.9	12.82	14.95	14.56	15.33	11.79	11.7	15.34
95-100	11.85	11.57	12.13	15.87	13.16	12.97	15.69	14.54	14.36	12.76	11.98	13.92
