# Supplementary material for: Short-chain soluble polyphosphate fertilizers increased soil P availability and mobility by reducing P fixation in two contrasting calcareous soils
Source: PeerJ. 2021 Jul 5;9:e11493. doi: 10.7717/peerj.11493 (PMC8265382; doi:10.7717/peerj.11493)
Supplement: Supplemental Information 3 [file peerj-09-11493-s003.xlsx]

## Sheet: Sheet1
Soil P dynamic transformation Incubation experiment
Incubation time（2013.08.24），soil weight： 258.45 g
The 1st soil sample collection time（2013.10.30）year-month-day
Treatment	resin- P （mg/kg）	NaHCO3-P（mg/kg）	NaOH-P（mg/kg）	HCl-P（mg/kg）	residual -P（mg/kg）	sum	total P	P recovery rate
CK	3.3365	8.2081	22.827	1126.98	268.899	1430.25	1.04639	0.731612
MAP	6.7515	8.5278	22.9371	1138.49	291.046	1467.76	1.09716	0.747507
Phosphoric acid	7.5443	15.2089	59.5204	1058.56	237.61	1378.45	1.0518	0.763031
APP	11.9626	26.0937	38.1512	1158.8	299.922	1534.93	1.1739	0.764791
The 2ed soil sample collection time（2014.01.14）year-month-day
Treatment	resin- P （mg/kg）	NaHCO3-P（mg/kg）	NaOH-P（mg/kg）	HCl-P（mg/kg）	residual -P（mg/kg）	sum	total P	P recovery rate
CK	2.552	33.164	25.091	1103.52	223.451	1387.77	1.029	0.741
MAP	3.04	33.106	31.104	1058.31	215.683	1341.24	1.063	0.792
Phosphoric acid	3.176	36.009	22.353	1058.56	229.337	1349.44	1.069	0.792
APP	13.086	67.968	36.985	973.432	216.408	1307.88	1.206	0.922
The 3rd soil sample collection time（2014.04.16） year-month-day
Treatment	resin- P （mg/kg）	NaHCO3-P（mg/kg）	NaOH-P（mg/kg）	HCl-P（mg/kg）	residual -P（mg/kg）	sum	total P	P recovery rate
CK	1.764	39.239	62.391	1167.89	88.299	1359.58	1.038	0.763
MAP	1.906	49.427	58.321	1206.95	82.259	1398.86	1.052	0.752
Phosphoric acid	2.542	51.746	62.965	1140.53	88.839	1346.62	1.078	0.8
APP	5.025	85.958	71.635	1200.72	91.976	1455.31	1.168	0.802
The 4th soil sample collection time（2014.07.16）year-month-day
Treatment	resin- P （mg/kg）	NaHCO3-P（mg/kg）	NaOH-P（mg/kg）	HCl-P（mg/kg）	residual -P（mg/kg）	sum	total P	P recovery rate
CK	3.455	24.133	29.216	1157.52	116.478	1330.81	1.076	0.809
MAP	3.308	45.087	33.626	1180.34	133.254	1395.62	1.105	0.792
Phosphoric acid	3.434	19.86	34.847	1152.31	97.432	1307.88	0.864	0.661
Ammoniumpolyphosphate	8.585	18.295	38.666	1243.1	100.131	1408.78	1.232	0.874
Note：
（1）P addition methods：Single application
（2）Data are showed as average value with three replications
