# Supplementary material for: Short-chain soluble polyphosphate fertilizers increased soil P availability and mobility by reducing P fixation in two contrasting calcareous soils
Source: PeerJ. 2021 Jul 5;9:e11493. doi: 10.7717/peerj.11493 (PMC8265382; doi:10.7717/peerj.11493)
Supplement: Supplemental Information 4 [file peerj-09-11493-s004.xlsx]

## Sheet: Water Soluble P variation Loam 
Water soluble P variations in loam soil
Basal application of different P fertilizers in loam soil
movement distance（mm）	CK-1	CK-2	CK-3	MAP-1	MAP-2	MAP-3	PA-1	PA-2	PA-3	APP-1	APP-2	APP-3
5_10	12.58	10.28	9.97	108.43	110.65	109.55	56.5	72.94	61.49	218.64	227.11	344.56
10_15	13.49	12.87	11.9	95.18	82.15	92.25	45.29	36.18	39.09	178.09	169.11	167.66
15-20	13.6	12.8	10.8	74.01	65.21	60.35	33.07	24.85	31.36	156.43	147.96	129.06
20-25	12.24	13.1	10.51	54.14	51.43	43.97	22.19	22.56	22.9	126.56	131.72	121.1
25-30	11.32	12.54	9.86	51.59	43.02	34.28	16.63	15.89	14.97	110.68	117.42	99.01
30-35	11.09	12.3	9.28	40.48	35.01	23.62	14.95	14.02	11.11	78.07	72.62	87.84
35-40	11.62	12.61	10.61	29.24	26.2	19.38	13.33	13.69	13.52	55.12	56.37	59.9
40-45	12.23	12.81	11.78	24.71	20.46	15.19	14.51	11.53	8.52	45.92	49.19	47.93
45-50	11.82	13.02	10.6	20.38	14.7	11.63	12.6	10.5	14.86	40.72	39.14	38.09
50-55	12.33	14.3	9.6	20.06	11.98	12.59	13.13	12.01	14.18	33.48	32.57	31.24
55-60	13.53	12.07	12.89	19.49	12.07	15.79	10.7	8.12	12.46	21.2	20.59	17.01
60-65	11.69	12.37	11.81	20.21	12.35	16.28	12.09	9.25	15.14	19.92	18.68	19.19
65-70	12.43	13.39	12.92	19.28	12.02	15.65	12.05	8.61	16.33	21.05	19.41	25.96
70-75	11.77	14.66	8.46	19.41	13.92	8.42	31.03	8.77	4.21	20.72	20.03	19.22
75-80	12.26	14.92	9.04	19.22	12.08	15.66	12.34	10.16	9.94	20.32	21.54	16.3
80-85	13.08	14.77	8.69	19.06	12.97	16.02	14.02	11.47	8.9	20.02	17.87	19.01
85-90	13.47	14.77	11.37	19.91	12.42	10.88	13.55	11.24	8.94	19.25	12.45	15.42
90-95	13.92	15.09	11.15	18.33	13.13	12.45	15.15	13.67	12.16	19.19	18.59	16.58
95-100	14.36	15.41	11.47	19.21	11.02	12	14.89	13.29	11.7	19.77	19.62	17.68
100-120	15.49	15.01	12.44	19.37	12.48	13.12	14.2	13	11.79	19.17	13.78	14.23
120-140	14.38	14.77	11.96	17.45	12.35	12.65	13.59	13.08	12.57	17.88	13.79	10.8
140-160	12.98	14.88	11.28	19.16	11.77	11.76	13.91	13.21	12.52	18.32	13.04	10.14
160-180	12.46	14.18	10.02	16.88	12.24	11.19	11.88	11.58	11.27	17.52	12.36	10.52
180-200	12.14	12.35	9.08	10.81	9.81	8.82	10.89	10.14	9.39	16.43	10.76	10.82
200-220	9.01	10.86	7.45	12.89	9.56	11.23	9.17	4.88	7.03	13.78	6.89	7.18
220-240	8.93	10.2	6.74	12.38	8.62	10.52	5.45	4.23	4.85	11.76	7.7	6.81
240-260	7.76	8.62	5.04	9.15	8.12	8.65	8.86	7.22	5.55	10.63	5.7	4.65
260-280	5.06	6.38	3.73	6.77	5.29	6.03	7.04	5.55	4.07	8.28	4.51	4.42
280-300	5.46	5.15	3.07	4.34	4.88	4.61	5.96	4.93	3.91	4.39	3.47	2.65
Split repeated application of different P fertilizers in loam soil
movement distance（mm）	CK-1	CK-2	CK-3	MAP-1	MAP-2	MAP-3	PA-1	PA-2	PA-3	APP-1	APP-2	APP-3
5_10	12.58	10.28	9.97	81.93	79.55	73.45	96.1	96.47	113.5	321.97	387.31	320.41
10_15	13.49	12.87	11.9	75.27	69.67	58.07	73.13	79.46	70.72	299.27	325.42	256.26
15-20	13.6	12.8	10.8	63.99	52.42	43.47	59.15	53.2	46.4	254.69	256.83	204.29
20-25	12.24	13.1	10.51	51.09	44.27	36.99	50.41	34.42	36.05	196.5	198.77	154.54
25-30	11.32	12.54	9.86	40.51	34.4	35.54	33.69	36.53	30.82	140.64	136.44	137.1
30-35	11.09	12.3	9.28	32.04	36.6	35.74	39.46	35.7	28.62	112.72	127.21	132.45
35-40	11.62	12.61	10.61	26.07	33.06	37.79	39.9	33.62	25.9	110.83	115.58	149.36
40-45	12.23	12.81	11.78	21.98	33.16	37.05	35.77	30.99	26.22	98.49	92.38	88.9
45-50	11.82	13.02	10.6	23.06	32.26	36.73	33.51	26.57	23.51	90.03	93.94	86.86
50-55	12.33	14.3	9.6	24.54	28.33	34.69	30.86	23.38	21.44	85.87	78.22	80.54
55-60	13.53	12.07	12.89	22.61	21.7	30.34	27.77	19.05	15.88	71.09	56.31	57.5
60-65	11.69	12.37	11.81	23.12	17.76	26.78	23.38	16.24	14.61	48.29	38.07	64.4
65-70	12.43	13.39	12.92	18.15	14.75	22.29	19.75	15.74	12.89	28.65	32.01	32.4
70-75	11.77	14.66	8.46	13.43	16.55	20.19	15.53	13.53	14.54	35.79	28.37	37.01
75-80	12.26	14.92	9.04	17.23	14.99	19.25	13.12	10.88	12.07	21.84	22.24	28.6
80-85	13.08	14.77	8.69	13.2	16	16.38	13.65	8.61	12.58	22.26	16.18	12.09
85-90	13.47	14.77	11.37	14.63	16.28	15.78	13.75	8.68	11.78	21.96	19.34	10.42
90-95	13.92	15.09	11.15	15.88	16.93	14.81	12.96	9.75	12.02	23.96	11.94	10.58
95-100	14.36	15.41	11.47	17.19	15.55	18.66	12.95	10.4	11.88	20.85	15.18	18.02
100-120	15.49	15.01	12.44	13.18	12.89	13.47	12.44	8.94	10.52	16.71	15.48	9.91
120-140	14.38	14.77	11.96	14.33	15.1	13.55	12.51	11.85	11.18	15.09	13.99	12.61
140-160	12.98	14.88	11.28	14.66	12.72	16.61	12.72	11.82	10.89	14.45	13.62	13.1
160-180	12.46	14.18	10.02	16.57	17.91	15.23	12.28	11.15	9.92	13.55	10.31	13.76
180-200	12.14	12.35	9.08	11.36	12	10.73	10.31	9.71	9.11	5.6	10.29	7.96
200-220	9.01	10.86	7.45	8.85	7.47	10.22	8.97	8.18	7.39	8.69	9.62	7.18
220-240	8.93	10.2	6.74	8.74	8.28	9.19	7.84	7.39	6.95	5.86	11.86	10.97
240-260	7.76	8.62	5.04	7.52	6.03	9.01	8.27	7.02	5.76	8.05	6.43	7.24
260-280	5.06	6.38	3.73	6.64	5.2	8.07	6.72	5.73	4.73	4.23	5.83	5.53
280-300	5.46	5.15	3.07	5.1	4.89	5.32	5.81	5.31	4.8	4.16	3.91	4.03

## Sheet: Water Soluble P in Clay soil
Water soluble P variations in clay soil
Basal application of different P fertilizers
movement distance（mm）	CK-1	CK-2	CK-3	MAP-1	MAP-2	MAP-3	PA-1	PA-2	PA-3	APP-1	APP-2	APP-3
0-5	8.88	12.28	9.51	80.19	86.3		112.89	118.31	107.47	492.27	491.33	517.99
2020-05-10	10.59	12.83	10.28	75.53	65.39		68.39	61.15	60.88	136.67	136	147.86
2020-10-15	8.88	13.96	11.36	69.8	67.13		62.2	58.17	55.61	92.69	90.36	94.73
15-20	10.93	14.27	13.08	65.04	61.8		50.17	43.33	47.55	86.48	84.87	89.36
20-25	12.82	16.45	12.31	55.28	52.99		40.51	34.73	43.94	78.57	79.06	77.46
25-30	11.28	15.24	12.79	44.8	43.34		49.27	31.66	35.58	74.71	71.04	75.1
30-35	12.29	16.31	14.21	31.29	35.45		33.9	22.79	27.19	62.86	68.58	62.89
35-40	13.6	14.88	14.53	29.26	29.45		27.83	17.61	19.54	58.17	55.84	59.77
40-45	11.31	15.46	14.25	19.47	18.78		23.13	13.8	17.05	37	38.88	36.88
45-50	15.56	16.34	13.44	18.92	14.12		20.22	18.64	17.05	27.13	26.89	25.97
50-55	14.83	16.04	14.91	14.98	14.25		21.59	12.84	16.15	26.51	24.38	25.3
55-60	14.46	15.87	14.22	14.1	16.39		16.75	16.23	15.7	16.4	17.25	16.87
60-65	16.54	16.93	16.73	17.71	13.48		17.35	17.36	17.37	14.48	15.39	16.3
65-70	15.68	14.53	16.66	12.06	13.58		17.21	17.78	18.36	19.14	18	17.53
70-75	15.6	13.58	17.82	15.57	15.45		19.25	19.56	19.88	17.17	15.83	17.65
75-80	15.35	16.92	17.53	15.02	15.67		17.51	13.5	15.3	18.71	16.04	17.4
80-85	15.84	14.02	16.99	15.86	13.97		19.51	13.75	16.63	15.56	15.47	16.65
85-90	15.76	12.11	18.49	15	13.8		16.3	16.21	15.92	17.86	17.51	15.18
90-95	15.64	16.56	14.73	14	16.09		15.3	16.21	15.21	16.85	15.73	16.16
95-100	16.77	17.75	15.47	14.46	13.93		15.86	13.36	16.37	16.85	17.1	16.38
Split repeated application of different P fertilizers
movement distance（mm）	CK-1	CK-2	CK-3	MAP-1	MAP-2	MAP-3	PA-1	PA-2	PA-3	APP-1	APP-2	APP-3
0-5	8.88	12.28	9.51	72.42	74.16	67.35	91.7	83.34	100.06	340.84	300.23	306.74
5_10	10.59	12.83	10.28	70.55	72.65	63.22	56.32	77.56	82.28	256.79	200.35	193.66
10_15	8.88	13.96	11.36	65.43	76.53	63.22	56.9	66.41	70.81	200.53	162.48	180.49
15-20	10.93	14.27	13.08	71.15	72.08	59.51	57.06	64.59	56.94	161.31	157.26	171.82
20-25	12.82	16.45	12.31	57.76	59.64	58.02	50.24	63.37	60.27	182.62	146.69	176.37
25-30	11.28	15.24	12.79	48.19	57.08	44.67	48.75	47.82	44.91	140.41	122.39	141.03
30-35	12.29	16.31	14.21	37.98	45.84	41.55	47.81	43.21	32.29	137.89	124.27	135.46
35-40	13.6	14.88	14.53	36.04	34.11	37.84	44.42	39.2	22.43	125.53	119.97	120.06
40-45	11.31	15.46	14.25	31.33	23.82	27.62	39.72	29.04	34.38	115.18	110.11	118.87
45-50	15.56	16.34	13.44	27.38	17.9	22.72	27.77	21.89	26.28	90.66	89.74	103.22
50-55	14.83	16.04	14.91	16.16	15.38	16.93	21.52	16.07	25.35	76.09	70.89	69.85
55-60	14.46	15.87	14.22	19.04	14.37	15.16	19.83	22.48	16.28	65.78	62.23	70.56
60-65	16.54	16.93	16.73	16.03	13.32	13.16	22.88	12.35	17.05	56.88	54.65	48.73
65-70	15.68	14.53	16.66	15.03	14.19	14.64	21.02	12.25	18.4	45.66	46.62	42.98
70-75	15.6	13.58	17.82	15.72	14.7	14.8	19.73	13.59	16.62	36.8	32.71	27.93
75-80	15.35	16.92	17.53	14.07	13.59	15.66	19.48	13.44	15.73	18.97	23.57	20.68
80-85	15.84	14.02	16.99	13.47	14.63	14.18	19.28	12.41	18.32	19.76	20.27	21.23
85-90	15.76	12.11	18.49	14.8	15.14	15.03	18.61	13.38	16.06	17.63	19.02	18.87
90-95	15.64	16.56	14.73	17.43	15.28	14.46	18.99	13.31	18.08	18.2	16.48	17.68
95-100	16.77	17.75	15.47	17.13	15.91	14.69	18.03	15.48	17.05	16.7	15.32	19.21
