# Supplementary material for: Short-chain soluble polyphosphate fertilizers increased soil P availability and mobility by reducing P fixation in two contrasting calcareous soils
Source: PeerJ journal article supplement (doi:10.7717/peerj.11493), 2021-07-05

**Figure Captions:**

**Supplementary Figure 1:** Picture of the center lathe machine used in this study and soil sampling method.

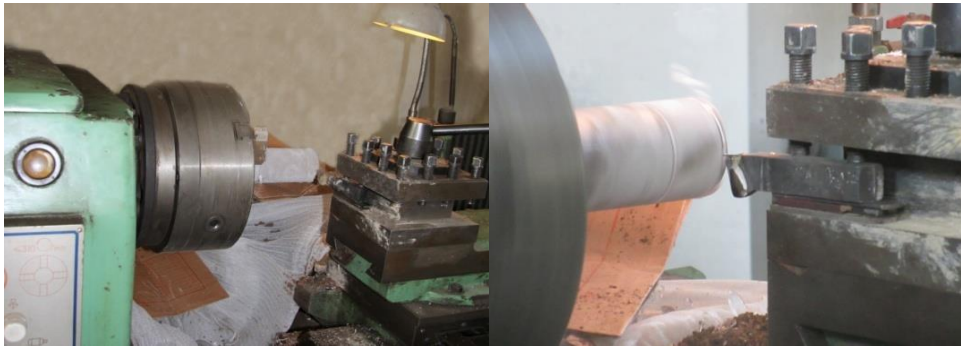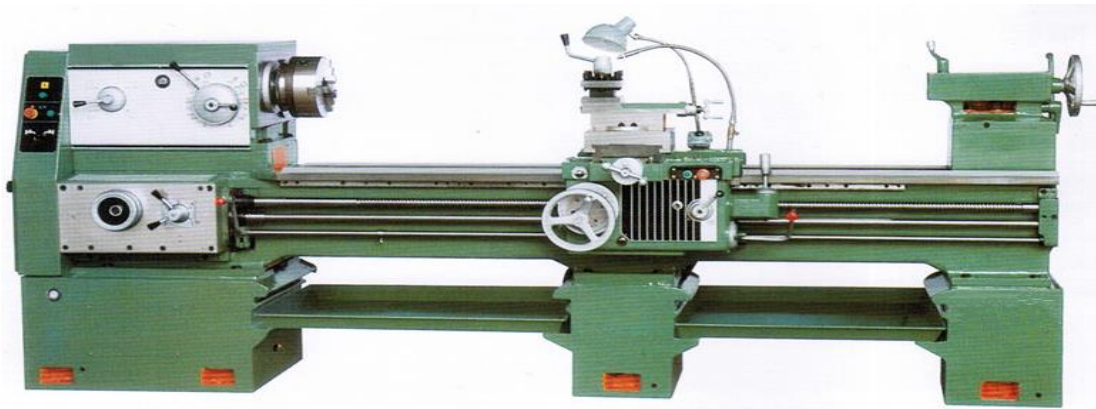

Supplement: Supplementary_Figures.pdf [file Supplementary_Figures.pdf]
